# Supplementary material
Source: publisher figshare collection journal article supplement (https://gsapubs.figshare.com/articles/dataset/_/19071791)
Supplement: Supplementary file 1 [file 1]

## Sheet: Table S4
Table S4 Zircon U-Pb dating and trace element compositions of the pelitic migmatities and zircon standards
Sample	207Pb/206Pb		207Pb/235U		206Pb/238U		rho	208Pb/232Th		207Pb/235U		206Pb/238U			Trace element (ppm)
	Ratio	1sigma	Ratio	1sigma	Ratio	1sigma		Ratio	1sigma	Age (Ma)	1sigma	Age (Ma)	1sigma	Concordance	Pb	Th	U	Th/U	La	Ce	Pr	Nd	Sm	Eu	Gd	Tb	Dy	Ho	Er	Tm	Yb	Lu	ΣREE
Pelitic migmatites
1-33
1-33-01	0.0502295	0.00534475	0.0864809	0.0073629	0.0131197	0.000317032	0.283826	0.00474053	0.000366249	84.2199	6.88132	84.0249	2.01777	0.99	2.54	31.5449	208.562	0.15125	bd	0.868333	0.0481959	0.949743	3.13938	0.169443	17.9457	3.2244	21.6181	3.99099	10.4819	1.50596	11.3826	1.46248	76.7872
1-33-02	0.0460806	0.00241512	0.086222	0.00438101	0.0135872	0.000210068	0.30428	0.004032	0.000413237	83.9779	4.0957	86.9992	1.33686	0.96	5.85082	15.0793	600.628	0.0251059	bd	0.546383	0.0240133	0.502208	2.6018	0.339672	20.3272	5.83124	47.1061	9.60546	28.1	4.49973	35.3732	4.71321	159.57
1-33-03	0.0498607	0.00240274	0.096274	0.00468495	0.0140133	0.000211249	0.309783	0.00661709	0.000493257	93.3311	4.33972	89.7087	1.34385	0.96	10.7056	32.4407	1023.46	0.031697	0.00548593	0.56974	0.00739476	0.31578	1.14349	0.274536	14.781	6.01282	62.1616	15.9348	44.2975	6.44934	46.1794	5.25969	203.393
1-33-04	0.0506021	0.0033681	0.0931321	0.00534501	0.0136045	0.000254384	0.325805	0.00439477	0.000492332	90.4169	4.96523	87.1092	1.61854	0.96	5.29318	19.028	513.435	0.0370602	bd	0.595922	0.0183898	0.605826	3.16872	0.224067	22.2927	5.57721	42.3394	8.75449	22.8414	3.61619	27.1711	3.38389	140.589
1-33-05	0.0486116	0.0030542	0.0909534	0.00509599	0.0139329	0.000228368	0.292539	0.00583871	0.000482922	88.3911	4.74337	89.1974	1.45272	0.99	6.14114	14.0785	596.249	0.0236117	0.00546775	0.397942	0.018417	0.292135	1.76301	0.154266	13.2307	4.25021	35.545	7.28109	22.0104	3.58887	30.9673	4.11245	123.617
1-33-06	0.0517687	0.00304724	0.0885978	0.00478318	0.0125454	0.00016553	0.244398	0.003833	0.000223254	86.1963	4.46187	80.3698	1.05474	0.93	9.5922	121.691	898.288	0.13547	bd	1.86557	0.0998008	1.96199	8.16564	0.422182	29.2651	5.83964	33.6036	5.45243	12.9491	1.7048	12.8178	1.42813	115.576
1-33-07	0.0497588	0.0050854	0.0873432	0.00778298	0.0131629	0.000296032	0.252388	0.00378737	0.000262942	85.0254	7.26814	84.2999	1.8841	0.99	3.03077	46.3491	237.776	0.194928	bd	1.46747	0.0719978	1.16429	4.58608	0.164419	17.3229	3.1036	20.3587	3.83916	10.0888	1.42184	10.9515	1.18717	75.7279
1-33-08	0.049491	0.00383257	0.0890025	0.00624932	0.0133461	0.000246373	0.26291	0.00401382	0.000298714	86.5737	5.82715	85.4654	1.56798	0.98	4.63646	48.3416	404.337	0.119558	0.00533102	1.31012	0.0716902	1.13748	4.19697	0.286491	19.7936	3.65266	25.9164	5.5598	16.0656	2.40002	20.7687	2.94177	104.107
1-33-09	0.0532408	0.0059096	0.0933716	0.00983495	0.0125439	0.000337018	0.255073	0.00507415	0.00055094	90.6393	9.13364	80.3601	2.14608	0.87	3.63153	47.3426	302.502	0.156504	0.0195669	1.61388	0.0722401	1.40303	3.91735	0.437257	23.8615	4.8299	32.1404	6.16374	17.0238	2.93971	22.7932	3.39881	120.614
1-33-10	0.0491558	0.00407008	0.0865903	0.00643959	0.0129864	0.000257375	0.266495	0.00457906	0.000438104	84.3221	6.01786	83.1766	1.63849	0.98	3.84761	36.4378	349.117	0.104371	0.010542	1.03307	0.0141496	0.539823	1.84955	0.195138	8.74746	1.81686	13.3021	2.9565	8.15279	1.36331	11.2731	1.4902	52.7445
1-33-11	0.0480887	0.00457423	0.0837056	0.00702801	0.0131173	0.000292948	0.265992	0.00498735	0.000351682	81.6229	6.58516	84.0096	1.86456	0.97	3.54652	55.0409	277.537	0.198319	0.00512981	1.66497	0.0619527	1.30264	4.86649	0.314245	21.9597	3.83644	23.7747	4.1379	10.265	1.49555	11.4333	1.18659	86.3047
1-33-12	0.048857	0.00234404	0.0917895	0.00449808	0.0135547	0.000176527	0.265758	0.00384921	0.00044033	89.169	4.18373	86.7924	1.12373	0.97	7.5277	21.7501	760.624	0.0285951	bd	0.570285	0.0210437	0.32116	2.14376	0.226813	16.7814	4.60628	35.6379	7.05803	20.7162	3.0772	26.8609	3.69115	121.712
1-33-13	0.0470874	0.00395583	0.0845227	0.006336	0.0128216	0.000243253	0.253088	0.00425494	0.000316129	82.3881	5.93234	82.1282	1.54889	0.99	3.79622	44.789	334.688	0.133823	0.0158965	1.28739	0.0497493	1.45347	4.44875	0.344687	18.4654	3.72134	25.6955	4.828	11.8642	1.96131	13.381	1.77056	89.2873
1-33-14	0.0487761	0.00347047	0.0903109	0.00614017	0.0134606	0.000261616	0.285863	0.0036695	0.000316809	87.7929	5.71852	86.1939	1.66473	0.98	4.13487	33.0246	384.876	0.085806	0.0109899	0.923757	0.043161	2.04234	7.89043	0.647514	47.7688	12.9098	76.4389	17.2542	38.7914	6.85844	39.6033	6.96507	258.148
1-33-15	0.0576107	0.00709158	0.0962226	0.00929363	0.0128443	0.000342112	0.275773	0.0044506	0.000339971	93.2835	8.60851	82.2721	2.17788	0.87	2.19732	38.5273	162.06	0.237735	bd	1.28337	0.0602699	1.2788	4.42067	0.381533	22.8275	4.55382	26.0027	6.26928	15.9816	2.9032	17.6032	3.29598	106.862
77-3
77-3-01	0.0471136	0.00385666	0.0887444	0.00698831	0.0136993	0.000267918	0.248356	0.00438106	0.000351408	86.3331	6.51769	87.7118	1.70443	0.98	5.89041	48.5384	380.182	0.127671	bd	1.76481	0.046314	0.898678	2.69186	0.178907	9.01996	1.39891	6.88028	0.939125	1.98415	0.280015	2.11947	0.34582	28.5483
77-3-02	0.0525436	0.00431325	0.0971457	0.0074399	0.0137433	0.000278925	0.265003	0.00501491	0.000345515	94.1381	6.88576	87.9919	1.77432	0.93	7.06114	50.681	344.932	0.146931	bd	2.04956	0.0837507	0.884359	2.70397	0.136504	8.35167	1.1931	5.00257	0.770814	1.88032	0.236488	1.9267	0.29494	25.5147
77-3-03	0.0494965	0.00360334	0.0937053	0.00597328	0.0136614	0.000275212	0.316027	0.00493834	0.000252531	90.9491	5.54587	87.4709	1.75086	0.96	7.68095	77.3314	303.12	0.255118	0.00710485	1.77828	0.0508155	2.06016	6.75674	0.468262	31.6643	4.62961	18.7546	2.0252	3.81401	0.453169	3.14493	0.399564	76.0068
77-3-04	0.0457646	0.0034652	0.087204	0.00663919	0.0134956	0.000266151	0.259035	0.00487298	0.00030312	84.8954	6.20087	86.4162	1.69352	0.98	6.83067	59.4497	421.964	0.140888	bd	2.01992	0.077915	2.16981	5.14573	0.271798	19.6637	2.7308	14.1146	2.14262	5.16291	0.622101	5.85925	0.72593	60.707
77-3-05	0.0529168	0.00552367	0.0967207	0.00852201	0.0138663	0.000314696	0.257577	0.00564636	0.000436518	93.7447	7.89024	88.7738	2.00149	0.94	5.48255	42.3644	245.259	0.172734	bd	1.9808	0.0318237	0.953075	3.66347	0.29518	14.0964	1.91454	6.85093	0.891144	1.60517	0.224478	1.82395	0.290983	34.6219
77-3-06	0.0518477	0.00553204	0.0971213	0.00857448	0.0139779	0.00033526	0.271673	0.00514235	0.000518576	94.1156	7.93592	89.4834	2.13198	0.94	3.53464	32.882	190.876	0.172269	bd	0.950772	0.0259658	1.60202	4.78539	0.392438	23.3158	4.1156	16.9313	2.03723	3.71121	0.418196	3.82182	0.589373	62.6971
77-3-07	0.0492838	0.00448537	0.0948542	0.00760247	0.0141953	0.000352882	0.31016	0.00456537	0.000396843	92.0152	7.05092	90.8655	2.24352	0.98	4.99463	51.2693	271.074	0.189134	bd	2.18561	0.0855757	1.44425	4.31517	0.279093	19.8049	2.46647	9.75245	1.18519	2.80955	0.351673	2.44535	0.431445	47.5567
77-3-08	0.0542502	0.0040818	0.106254	0.00730576	0.0144431	0.000291068	0.293098	0.00453779	0.000292836	102.532	6.70601	92.44	1.8503	0.89	7.89364	72.6957	394.298	0.184367	0.00769412	1.64574	0.0989623	2.31932	6.84989	0.612075	41.16	6.41012	24.9662	3.18417	5.92043	0.801946	4.58263	0.880676	99.4399
77-3-09	0.0510696	0.00572667	0.0946041	0.00993695	0.0139367	0.000404359	0.276226	0.00502718	0.000349866	91.7832	9.21798	89.2213	2.57129	0.97	4.88777	64.7316	161.561	0.400662	0.00797027	1.4673	0.0166907	0.736151	2.42455	0.188196	9.13222	0.966816	3.61317	0.532709	1.10534	0.159196	0.760249	0.160132	21.2707
77-3-10	0.0508901	0.0050269	0.0908833	0.00666095	0.0138541	0.000344941	0.339714	0.00455659	0.000275112	88.3259	6.20024	88.6963	2.19377	0.99	5.46187	68.8203	233.409	0.294848	bd	2.16123	0.0343297	1.33383	3.20893	0.302101	9.90645	1.30726	5.30708	0.759041	1.53849	0.183707	1.75657	0.196151	27.9952
77-3-11	0.0531679	0.00513979	0.0933556	0.00698739	0.01332	0.000395042	0.396246	0.00468203	0.000309741	90.6245	6.48938	85.2995	2.51355	0.93	5.54041	60.115	188.089	0.31961	bd	1.76816	0.0359514	0.774567	2.35826	0.208532	8.28897	1.0803	4.31168	0.631686	1.48218	0.181143	1.43073	0.168491	22.7206
77-3-12	0.0451063	0.00514862	0.0912511	0.00966591	0.0144312	0.00031969	0.209133	0.0048629	0.000353682	88.6682	8.9941	92.3645	2.03215	0.95	5.76645	55.9394	256.368	0.218199	bd	1.85257	0.100293	2.14872	5.33821	0.272709	18.1016	2.36603	9.60537	1.61397	3.49269	0.506912	3.72874	0.451894	49.5797
77-3-13	0.05357	0.00504675	0.0933764	0.00769886	0.0129742	0.000326367	0.305096	0.00419545	0.000425594	90.6438	7.14995	83.0993	2.07744	0.91	4.0245	39.0948	228.677	0.170961	bd	1.36967	0.0226226	1.08042	3.13778	0.187014	9.87765	1.86218	9.62696	1.59632	3.55697	0.491562	3.15892	0.566654	36.5347
77-9
77-9-01	0.044777	0.00385941	0.0844566	0.00656206	0.0137638	0.000262954	0.245886	0.00476271	0.000333346	82.3263	6.14435	88.1221	1.67277	0.93	6.65598	76.0992	368.583	0.206464	bd	1.25915	0.0266193	1.03546	2.06291	0.187145	11.3741	2.10547	14.6042	2.4739	9.54135	1.53372	15.0254	2.51641	63.7459
77-9-02	0.0490716	0.00405152	0.0915896	0.00636846	0.013877	0.000314974	0.326432	0.0043011	0.000351194	88.9831	5.92417	88.8417	2.00324	0.99	4.98603	43.9844	350.6	0.125455	bd	0.804511	0.021176	0.544867	2.60678	0.186036	11.7396	2.23836	11.2323	1.55997	3.47819	0.449041	3.40255	0.451737	38.715
77-9-03	0.0480351	0.00400484	0.0918373	0.00773919	0.0134742	0.000290869	0.256164	0.00665498	0.000745871	89.2135	7.19752	86.2803	1.85072	0.96	5.2973	41.2196	335.752	0.122768	bd	1.02949	0.0255955	0.476926	1.72642	0.138611	9.97254	2.00375	14.0286	2.64718	8.49203	1.22008	10.1931	1.41113	53.3655
77-9-04	0.0580075	0.00476955	0.101012	0.00760392	0.0128183	0.000265028	0.274659	0.00486637	0.000383238	97.7097	7.01285	82.1071	1.68744	0.82	6.14378	62.2399	359.645	0.17306	0.0145988	1.06351	0.0417953	0.656459	1.88496	0.12841	8.94522	1.75495	12.4466	2.80641	10.1434	1.78613	18.0749	3.06024	62.8076
77-9-05	0.0529512	0.00478907	0.0965857	0.00779878	0.0140227	0.000290427	0.256502	0.00481368	0.0004876	93.6198	7.22156	89.7685	1.84696	0.95	5.00037	33.1141	349.273	0.0948087	bd	0.765844	0.0307612	0.556231	3.56442	0.269984	22.5253	4.25476	24.2437	3.46099	8.95748	1.18841	10.5803	1.1715	81.5697
77-9-06	0.0489433	0.0036742	0.0949437	0.00652274	0.0145306	0.000311678	0.312217	0.00639952	0.000753384	92.0983	6.04911	92.9966	1.98106	0.99	5.58166	18.2383	441.248	0.0413334	0.014037	0.538876	0.0150973	0.545375	1.87987	0.326586	18.2651	5.21551	38.4334	6.62463	16.3794	2.07095	15.2208	2.04398	107.574
77-9-07	0.0554322	0.00604911	0.0997603	0.00922628	0.0139048	0.000367208	0.285547	0.00435097	0.000353699	96.5551	8.51867	89.0189	2.3352	0.91	4.72204	59.2255	253.171	0.233935	bd	1.13142	0.0214185	0.824435	2.83424	0.140853	11.5295	1.70306	10.5005	1.85836	5.41343	0.847051	6.36108	1.08092	44.2463
77-9-08	0.0472931	0.00407383	0.088078	0.00717517	0.0137667	0.000328718	0.293108	0.0048638	0.000366309	85.7114	6.69605	88.1408	2.09082	0.97	5.36945	52.6225	327.2	0.160827	0.0147039	1.24868	0.0896701	1.076	5.18347	0.314452	21.6276	3.65706	18.8763	2.71912	6.18626	0.826773	8.01171	0.819803	70.6517
77-9-09	0.0464531	0.00436711	0.0920813	0.00761861	0.0148781	0.000284466	0.231089	0.00608244	0.000542589	89.4403	7.08381	95.2037	1.80763	0.93	5.15	31.2769	354.518	0.0882236	0.0163217	0.631152	0.0585859	0.868035	3.26136	0.174574	21.2224	4.76443	29.8196	4.35576	9.8679	1.2441	9.40236	1.18958	86.8761
77-17
77-17-01	0.0526836	0.00815579	0.0863243	0.0107144	0.0128947	0.000337279	0.210738	0.00466514	0.000392379	84.0735	10.0149	82.5932	2.14702	0.98	3.45525	42.3072	141.849	0.298254	bd	1.52242	0.0355973	0.914448	4.47725	0.229927	12.5019	1.89748	12.0214	2.44393	6.83732	0.96014	7.38283	0.966962	52.1917
77-17-02	0.0501765	0.00288255	0.0859735	0.00469068	0.0125745	0.000207781	0.302861	0.00433794	0.000303915	83.7456	4.38614	80.5552	1.32352	0.96	8.70104	59.0978	697.412	0.0847388	bd	1.1628	0.0563803	1.52693	5.31655	0.418978	23.7303	4.69166	31.3092	6.22618	19.2183	2.71983	23.5217	3.32453	123.223
77-17-03	0.0479487	0.00680545	0.0843899	0.0108856	0.012917	0.000350847	0.210568	0.00440513	0.000357525	82.2638	10.1931	82.7354	2.23331	0.99	2.34945	28.3394	121.457	0.233329	bd	1.02646	0.0411102	0.723041	2.42049	0.152383	8.37698	1.41346	7.69661	1.49589	4.72255	0.681812	5.61784	0.831954	35.2006
77-17-04	0.0473382	0.00511357	0.079737	0.00663123	0.0128209	0.000307149	0.288069	0.00447794	0.000524998	77.8977	6.23623	82.1234	1.95545	0.94	3.44257	32.3831	231.113	0.140118	0.0072794	0.940501	0.0104334	1.02686	3.98435	0.254116	14.564	2.63196	18.0934	3.10005	8.78238	1.30102	10.5052	1.56501	66.7666
77-17-05	0.0518424	0.00670009	0.0880731	0.0113583	0.0131349	0.000474516	0.280126	0.00414235	0.0002938	85.7068	10.5997	84.1216	3.01961	0.98	2.59846	35.4473	115.885	0.305884	0.00721051	1.315	0.0568136	0.545744	2.59947	0.116876	9.10937	1.4142	7.49682	1.34353	3.85552	0.561675	3.82824	0.662968	32.9134
77-17-06	0.0504149	0.00291789	0.09185	0.00536742	0.0132283	0.000193211	0.249942	0.00397147	0.000310421	89.2252	4.99189	84.7162	1.23011	0.94	9.2055	45.4273	805.637	0.0563868	0.00707042	0.875764	0.0506332	1.34059	4.73021	0.264485	29.7315	6.35608	43.3861	7.53281	19.8867	2.54133	17.822	2.22314	136.748
77-17-07	0.0526931	0.00399451	0.0955384	0.0062415	0.0133575	0.00026815	0.307286	0.00431585	0.000360863	92.6496	5.78518	85.5378	1.70645	0.92	4.25818	27.303	338.494	0.0806604	0.00741468	0.876346	0.0265461	0.927418	4.13363	0.305105	14.7634	3.17034	20.3054	3.76607	11.5266	1.57882	11.9439	1.84553	75.1765
77-17-08	0.0451918	0.00653304	0.0867555	0.0105698	0.0138214	0.000434598	0.258086	0.00458512	0.000639217	84.4765	9.87581	88.4884	2.76382	0.95	1.64562	16.9579	103.97	0.163105	bd	0.917713	0.020743	0.701496	2.27395	0.171606	8.81939	1.38767	5.58887	0.794469	1.9744	0.242608	2.05262	0.24497	25.1905
77-17-09	0.0447801	0.00437333	0.0808528	0.0073508	0.0131692	0.000343659	0.287031	0.00450343	0.000701401	78.9464	6.90575	84.3399	2.18705	0.93	2.59537	16.8916	195.184	0.0865416	bd	0.963822	0.0205501	0.753508	2.35595	0.0695313	9.03326	2.01789	13.2597	2.59566	7.65001	1.13878	8.82313	1.53264	50.2145
77-17-10	0.0536147	0.00442009	0.102925	0.00782717	0.0142549	0.000291948	0.269312	0.00497116	0.000414287	99.4725	7.20622	91.2442	1.85622	0.91	4.59655	41.1139	262.818	0.156435	0.00731755	1.15551	0.0523655	1.3592	4.8386	0.254891	16.8809	2.99927	18.2986	3.26321	7.51638	1.14115	8.51425	1.17179	67.4535
77-17-11	0.0493111	0.00438042	0.0906726	0.00780423	0.0133026	0.000244481	0.213528	0.0049772	0.000531996	88.1297	7.26575	85.1887	1.55602	0.96	4.9369	45.5084	317.996	0.14311	bd	1.19243	0.07602	1.63137	5.68473	0.441774	34.8638	5.96087	30.273	5.33239	14.4194	2.19564	16.4036	2.43764	120.913
Zircon standards
91500	0.0743827	0.00337008	1.82558	0.0816271	0.177908	0.0030411	0.182018	0.0544787	0.00207206	1054.69	29.3417	1055.54	16.653	0.99	15.6827	28.1608	75.3904	0.373533	bd	2.36602	0.0234379	0.342852	0.417135	0.191393	2.35356	0.758194	9.33033	4.47923	22.3066	5.68344	58.4402	12.462	119.154
91500	0.0753773	0.00332015	1.87482	0.0817167	0.180432	0.00288124	0.0850018	0.0536013	0.00208992	1072.23	28.8715	1069.33	15.7452	0.99	15.8417	27.3328	74.9024	0.364912	bd	2.22472	bd	0.317421	0.358601	0.251242	2.03445	0.644499	10.4048	4.29457	22.2243	5.71428	56.5249	12.3119	117.306
91500	0.0760402	0.00318286	1.87328	0.0813356	0.178123	0.00273854	0.220683	0.0540491	0.00199096	1071.69	28.7523	1056.71	14.9955	0.98	15.8756	27.4679	75.178	0.365371	bd	2.37717	0.0124709	0.130405	0.344378	0.287887	2.00875	0.860092	10.9078	4.39635	22.5321	5.45365	58.6125	12.6241	120.548
91500	0.0737198	0.00318132	1.82712	0.0780291	0.180217	0.00300194	0.150831	0.0540309	0.0019614	1055.25	28.0339	1068.16	16.4069	0.98	16.1248	27.7826	75.7939	0.366554	0.0127359	2.35859	0.0137859	0.193413	0.496247	0.237745	1.61212	0.756631	9.59589	4.39711	22.5531	5.60945	58.5073	12.3239	118.668
91500	0.0754612	0.00311093	1.85925	0.0747983	0.178942	0.00283299	0.0188428	0.0544017	0.00190921	1066.72	26.5724	1061.19	15.5013	0.99	16.0449	28.9412	81.1067	0.356828	bd	2.42437	0.209908	0.22979	0.431887	0.300864	2.47181	0.808752	10.5068	4.3089	22.4608	6.13289	61.654	12.654	124.595
91500	0.0742988	0.00323205	1.84115	0.0769768	0.179398	0.00257759	0.015501	0.0536783	0.00192406	1060.27	27.5198	1063.69	14.1004	0.99	16.2561	29.2646	81.5703	0.358765	0.00647294	2.3009	0.018424	0.0823734	0.235358	0.143881	2.05681	0.77995	10.7508	4.47058	23.5352	5.78585	61.0712	13.0596	124.297
91500	0.0697325	0.00283239	1.72627	0.0707642	0.178932	0.00299048	0.269479	0.0547809	0.00196743	1018.36	26.3648	1061.14	16.362	0.95	16.2301	28.277	79.2749	0.356695	bd	2.25071	0.0183807	0.0282143	0.405561	0.255406	2.87562	0.826882	10.083	4.42447	22.5723	5.99634	57.8272	12.1059	119.67
91500	0.0800275	0.00304058	1.97413	0.0736492	0.179408	0.00278633	0.0903754	0.0532991	0.00186533	1106.72	25.1554	1063.74	15.2403	0.96	16.4468	28.5223	79.1612	0.360307	0.0129447	2.23371	0.0919269	0.154187	0.260739	0.239506	2.23463	0.735655	11.2413	4.28208	23.3062	5.73853	59.2057	12.0353	121.772
91500	0.078128	0.00591009	1.92312	0.138259	0.179206	0.0027767	0.0252992	0.0549199	0.00241188	1089.15	48.0318	1062.64	15.1904	0.97	16.2302	28.3028	77.6475	0.364503	bd	2.45464	0.0150079	0.270378	0.458	0.164777	2.34012	0.840239	10.0252	4.31263	22.1921	5.73061	60.1667	12.6874	121.658
91500	0.071632	0.00347901	1.77728	0.0859939	0.179134	0.0029086	0.272619	0.0531601	0.00196252	1037.18	31.4476	1062.24	15.9119	0.97	16.0759	28.7016	77.7196	0.369296	0.00622423	2.48515	0.0222825	0.196549	0.486399	0.20717	2.18755	0.815863	10.2675	4.51371	22.1264	5.6663	59.6331	12.7077	121.322
91500	0.0747174	0.00297181	1.83075	0.0766252	0.176997	0.00252741	0.295315	0.0541099	0.0020145	1056.55	27.4946	1050.55	13.8542	0.99	15.705	26.9046	73.6689	0.365209	0.00603157	2.24192	0.0171601	0.29112	0.322595	0.26242	1.89303	0.848396	10.0673	4.12398	21.5112	5.25164	57.1081	11.9352	115.88
91500	0.0750426	0.00291704	1.86965	0.0732764	0.181343	0.00269049	0.139413	0.0539701	0.00205963	1070.41	25.938	1074.3	14.6931	0.99	14.2252	23.3816	65.0344	0.359527	bd	2.24465	0.0127377	0.0720542	0.223633	0.215226	1.8496	0.654715	9.18744	3.85327	20.3397	5.16237	52.8874	11.6351	108.338
91500	0.0749515	0.00281793	1.85924	0.074484	0.179428	0.00274617	0.3325	0.0543519	0.00196479	1066.72	26.461	1063.85	15.0207	0.99	15.088	25.7448	70.2291	0.366583	0.0180378	2.18379	0.00854519	0.0969836	0.620781	0.15422	1.91775	0.778552	10.262	4.16768	21.3796	5.35713	55.1125	12.3161	114.374
91500	0.0748085	0.0024893	1.84116	0.0644356	0.178912	0.00268744	0.273825	0.0537281	0.0019231	1060.28	23.0395	1061.03	14.7064	0.99	15.6146	26.5526	72.6978	0.365246	bd	2.18408	0.0167551	0.0974553	0.415084	0.11804	1.74359	0.796239	9.81167	4.31971	21.5331	5.3314	55.5155	11.477	113.36
91500	0.075156	0.00340732	1.85063	0.0867578	0.178177	0.00280868	0.316351	0.0552572	0.00206321	1063.66	30.9112	1057.01	15.3783	0.99	12.9523	22.4004	63.422	0.353196	bd	2.03623	0.0173762	0.20146	0.0785271	0.176772	1.90404	0.682557	8.71804	3.87132	20.7213	4.98822	50.6955	11.2266	105.318
91500	0.074604	0.00315226	1.84977	0.0826569	0.180163	0.00299874	0.240632	0.0528228	0.00208274	1063.35	29.4599	1067.86	16.3902	0.99	12.9044	22.3184	62.735	0.355756	bd	1.98328	0.00875042	0.228215	0.197994	0.22446	1.94223	0.618859	8.30983	3.64812	19.0803	5.06186	52.5664	11.1266	104.997
91500	0.0706412	0.00321194	1.7384	0.0795575	0.178035	0.00275627	0.205831	0.0556247	0.00204299	1022.87	29.5077	1056.23	15.0936	0.96	13.0511	22.12	63.1953	0.350026	bd	1.94273	0.00906942	0.18964	0.293004	0.138099	1.99114	0.688749	9.43868	3.77477	20.2201	4.88628	49.5178	11.0096	104.1
91500	0.0791188	0.00356649	1.962	0.0884704	0.180305	0.00293425	0.134013	0.0524553	0.00206149	1102.57	30.3372	1068.64	16.0362	0.96	13.6756	23.3882	65.63	0.356364	bd	1.90712	0.0179113	0.077746	0.347156	0.235353	1.73098	0.763412	8.65845	3.86913	19.8752	5.19802	55.5405	10.9897	109.211
91500	0.0724811	0.00320422	1.80282	0.0857568	0.179684	0.00320981	0.352653	0.0551117	0.00196908	1046.48	31.0755	1065.25	17.5495	0.98	13.719	23.1444	65.2761	0.354561	bd	1.99688	0.0221825	0.100954	0.284414	0.217865	1.51739	0.66078	9.16564	3.83409	19.2911	5.28255	52.217	10.655	105.246
91500	0.0772789	0.00333677	1.89758	0.084123	0.178656	0.00328248	0.324579	0.0529683	0.00195959	1080.24	29.4879	1059.63	17.962	0.98	13.298	22.4936	63.3242	0.355214	0.0255394	1.98546	0.0546364	0.0776852	0.49615	0.2555	2.29713	0.76583	9.37649	3.84312	20.7397	5.10085	52.4237	10.9293	108.371
91500	0.0749361	0.00296654	1.84805	0.0789734	0.177965	0.00301539	0.389983	0.0538448	0.00208518	1062.74	28.1647	1055.85	16.5116	0.99	13.5566	22.5962	64.9846	0.347717	0.0189112	2.19852	bd	0.15339	0.582631	0.236797	2.04695	0.719532	8.82971	3.8818	21.7882	5.06259	53.546	11.5566	110.622
91500	0.0748239	0.0030813	1.85235	0.0765903	0.180375	0.00290709	0.117887	0.0542352	0.0021788	1064.27	27.2743	1069.02	15.8871	0.99	13.3238	22.1711	63.103	0.351348	0.0125032	2.03119	0.0489098	0.228181	0.113912	0.15658	2.05029	0.630838	8.78546	3.9237	20.5279	5.08368	50.9813	10.941	105.515
91500	0.0725899	0.00356024	1.78858	0.0880792	0.179674	0.00342757	0.138925	0.0534013	0.00240152	1041.31	32.0794	1065.19	18.739	0.97	12.7331	21.0311	60.268	0.34896	0.00511818	2.17353	bd	0.127083	0.305994	0.153488	1.72404	0.726344	8.28834	3.5599	19.974	5.16148	56.5279	10.673	109.4
91500	0.0771701	0.00358973	1.91182	0.0930329	0.178666	0.00311524	0.27608	0.0546787	0.00231971	1085.22	32.4499	1059.68	17.0476	0.97	13.4622	23.8284	63.1422	0.377377	bd	2.2958	bd	0.0848086	0.280774	0.160314	1.59289	0.826428	9.75981	4.02867	19.9456	5.49191	57.3441	10.9962	112.807
91500	0.0761549	0.00361102	1.88227	0.0906745	0.178762	0.00330224	0.222546	0.0534859	0.0020922	1074.86	31.9517	1060.21	18.0684	0.98	15.0115	32.0091	72.1244	0.443803	bd	1.81546	0.0143555	0.267494	0.960977	0.424112	3.85833	1.54775	18.6354	7.93432	36.892	10.1383	108.227	17.8904	208.606
91500	0.0736051	0.00391887	1.81813	0.0942676	0.179578	0.00303164	0.00880403	0.0545941	0.00233931	1052.01	33.9725	1064.67	16.5779	0.98	15.8225	35.0033	74.7988	0.467966	bd	2.22766	0.0237221	0.471511	1.16433	0.581606	4.96934	1.78036	21.8114	7.54892	41.6369	10.6284	115.728	18.7903	227.363
91500	0.0753718	0.00342001	1.876	0.0845535	0.179306	0.0026942	0.203074	0.055358	0.00209911	1072.65	29.8608	1063.18	14.7384	0.99	14.87	31.9631	70.6609	0.452345	bd	2.35571	0.0180504	0.476576	0.972384	0.613082	4.8311	1.51973	19.0088	7.57684	37.5606	10.1421	109.13	17.7987	212.003
91500	0.0778387	0.00354826	1.92375	0.0881356	0.17868	0.00302385	0.092526	0.053132	0.00189621	1089.37	30.6174	1059.76	16.5479	0.97	14.2797	30.588	68.5702	0.446083	bd	2.0996	0.00919027	0.570952	0.819315	0.398898	3.72546	1.51633	16.9909	7.5204	34.7114	9.21334	101.705	16.5352	195.816
91500	0.0965204	0.00424572	2.38325	0.103321	0.179795	0.00278118	0.0910658	0.0765158	0.00322179	1237.59	31.0203	1065.86	15.2073	0.85	16.6033	35.2576	76.2747	0.462245	0.0527306	3.32493	0.109822	0.745808	0.953659	0.57856	4.46511	1.81013	20.9015	8.21954	39.8293	10.9494	112.116	18.6418	222.698
91500	0.0805416	0.00362541	1.96644	0.0846387	0.178692	0.00244872	0.11981	0.054824	0.00202313	1104.09	28.9807	1059.82	13.4046	0.95	14.7908	32.4979	72.2754	0.44964	0.00767086	1.9577	0.0254212	0.379815	0.933786	0.360291	4.97463	1.67844	19.7172	7.90282	39.3979	10.1527	109.903	17.8928	215.284
91500	0.0717264	0.00372009	1.76721	0.0918154	0.178853	0.0029087	0.17045	0.0548082	0.00230735	1033.5	33.6975	1060.71	15.9162	0.97	12.125	24.5822	61.2218	0.401527	bd	1.9849	0.0179128	0.327673	0.361273	0.34925	3.11708	1.19531	15.4625	6.09814	29.6532	8.27387	88.0362	14.7167	169.594
91500	0.0780336	0.00374956	1.93319	0.0924244	0.179487	0.00272386	0.195834	0.0532718	0.00218414	1092.64	32.0032	1064.17	14.8982	0.97	14.1048	31.1956	69.682	0.447685	bd	2.11864	0.0235685	0.352254	0.864107	0.413675	4.0917	1.59661	18.788	7.34845	37.4488	9.44697	110.373	17.5235	210.389
GJ-1	0.0624171	0.00212199	0.855987	0.0295592	0.0990564	0.0014584	0.26326	0.0357242	0.00257444	627.93	16.177	608.877	8.5604	0.96	29.8265	8.33092	282.852	0.0294533	bd	14.1117	0.0226315	0.624456	1.59494	0.840304	5.15582	1.73233	18.023	5.91237	25.4277	5.31913	51.2806	11.4887	141.534
GJ-1	0.0570024	0.00177486	0.775745	0.0230189	0.0986819	0.00127512	0.082416	0.0308532	0.00196039	583.053	13.1683	606.679	7.48882	0.96	29.5766	8.22509	282.347	0.0291311	bd	13.9107	0.0636941	0.330725	1.68127	0.99672	6.38308	1.66464	16.1794	6.24713	25.741	5.61452	54.14	11.2149	144.168
GJ-1	0.0581076	0.00195742	0.798441	0.0255084	0.0997346	0.00137413	0.0151259	0.0329077	0.00243231	595.949	14.4075	612.854	8.06164	0.97	29.3002	8.0029	286.001	0.0279821	bd	13.7959	0.0377221	0.341715	1.12979	0.777409	6.68844	1.71509	17.9378	5.86314	25.4395	5.35116	52.2587	11.1758	142.512
GJ-1	0.0565483	0.00224852	0.76122	0.03026	0.0970576	0.00136582	0.260982	0.0339062	0.0021307	574.714	17.4499	597.142	8.03217	0.96	28.8899	8.20106	286.085	0.0286665	bd	14.0234	0.0192229	0.583041	1.20366	0.748132	5.66716	1.63747	17.3832	5.70438	26.9964	5.65784	53.6741	11.5288	144.827
GJ-1	0.0618274	0.00183085	0.82586	0.0260883	0.0967502	0.00134257	0.343735	0.032799	0.0020579	611.312	14.514	595.336	7.89782	0.97	28.6317	8.06951	274.964	0.0293475	bd	13.2317	0.0137615	0.572318	1.42297	0.738442	6.23007	1.73562	17.4091	5.74823	25.2696	5.10749	50.8072	10.9156	139.202
GJ-1	0.0564549	0.00184238	0.753772	0.0249299	0.097089	0.00131192	0.171166	0.0329981	0.00209422	570.41	14.4389	597.327	7.71551	0.95	28.5732	8.08386	274.096	0.0294928	0.00662314	13.1954	0.00670727	0.640841	1.21195	0.996685	5.78019	1.75458	15.8434	5.85513	25.5835	5.26562	51.1614	11.0265	138.328
GJ-1	0.0598811	0.00197732	0.822253	0.0286296	0.0996401	0.00146925	0.311024	0.0332864	0.0019518	609.305	15.9582	612.299	8.61952	0.99	29.7201	8.63881	284.975	0.0303143	0.00692142	14.4255	0.0290772	0.253944	1.37836	0.75436	6.03911	1.97913	17.3293	6.1377	26.4809	5.69375	52.3571	11.4123	144.278
GJ-1	0.0609207	0.00202962	0.820201	0.0284417	0.0973857	0.00125587	0.24608	0.0344603	0.00203775	608.16	15.8713	599.07	7.3845	0.98	28.7253	8.1211	282.856	0.0287111	0.0204587	14.0355	0.0238799	0.249003	0.956943	0.822634	5.40706	1.57786	17.4271	6.01553	25.6707	5.70801	52.1848	11.533	141.632
GJ-1	0.0634739	0.00216224	0.853371	0.0304054	0.0971184	0.00135535	0.287944	0.0318521	0.00174248	626.498	16.6633	597.499	7.97026	0.95	29.7936	8.54636	289.213	0.0295504	0.00631719	14.3597	bd	0.947926	1.28263	0.798814	6.84646	1.80116	17.202	6.22931	26.1883	5.6087	53.801	11.4466	146.519
GJ-1	0.0626726	0.00239052	0.875529	0.0343369	0.100028	0.00144299	0.288443	0.0374146	0.00247324	638.565	18.5945	614.576	8.46276	0.96	30.4513	9.1464	290.53	0.0314817	0.00701612	13.6572	0.0229419	0.655526	1.2282	0.960639	5.99784	2.01634	18.6498	6.39533	26.9014	6.06442	64.2512	10.3524	157.16
GJ-1	0.0600935	0.00247366	0.83465	0.0351856	0.0994242	0.00140495	0.231037	0.0371701	0.00230802	616.189	19.4779	611.034	8.24445	0.99	29.6513	8.78591	285.934	0.0307271	bd	13.394	0.0173717	0.323727	1.35602	1.02404	6.67719	1.87404	18.391	5.89093	26.9317	6.28648	63.3618	10.2451	155.773
GJ-1	0.0607254	0.00263597	0.847002	0.033741	0.100144	0.0014828	0.138684	0.037022	0.00245277	623.002	18.5538	615.254	8.69495	0.98	29.6444	9.31111	293.34	0.0317417	bd	14.069	0.0318385	0.566462	1.53471	0.942943	6.43911	1.97318	19.9213	6.51752	27.0654	5.98306	66.4955	10.7577	162.298
Plešovice	0.0536418	0.00164892	0.399359	0.0128888	0.0535027	0.000616628	0.332597	0.0191108	0.000778912	341.183	9.35505	335.99	3.77752	0.98	35.8662	59.1594	614.282	0.0963067	0.414524	5.6906	0.899341	5.83281	4.69399	1.74531	13.1777	4.96063	51.3873	14.49	51.6079	8.5882	64.5604	9.75113	237.8
Plešovice	0.0513473	0.00178272	0.392066	0.0133	0.0554128	0.00072147	0.0169056	0.0182673	0.000650159	335.877	9.70378	347.668	4.4107	0.96	35.7001	55.6562	593.548	0.0937686	0.061318	1.88821	0.18455	1.5878	3.19516	0.930778	11.8265	4.42379	45.7976	13.6669	49.9611	8.58676	60.7541	8.91857	211.783
Plešovice	0.0530692	0.00164157	0.401962	0.0127152	0.0544595	0.00065363	0.253558	0.0164992	0.000618008	343.071	9.21206	341.843	4.00021	0.99	35.6053	58.7302	631.355	0.0930226	0.00639498	1.84877	0.13636	1.7618	3.38247	0.870496	12.7786	4.98075	48.6667	14.4371	52.438	8.75256	64.0353	9.38483	223.48
Plešovice	0.0523628	0.00198681	0.397891	0.01454	0.0542507	0.000731795	0.264287	0.0202582	0.00113192	340.118	10.5639	340.566	4.47848	0.99	37.2738	59.2517	631.375	0.0938456	bd	1.95813	0.164379	1.81409	2.86708	1.08073	12.5734	4.4997	51.8707	14.401	50.1168	8.72061	65.6237	8.98952	224.68
Plešovice	0.0535975	0.00178595	0.404133	0.0124884	0.0538188	0.000786457	0.201511	0.0200332	0.0011635	344.641	9.03388	337.925	4.81437	0.98	37.3016	58.8306	634.136	0.0927729	0.0128347	1.90425	0.12402	1.58581	3.38205	0.818659	12.312	4.63938	50.8661	14.5858	52.814	9.2026	62.6113	9.03393	223.893
Plešovice	0.0504008	0.00145941	0.370796	0.0109415	0.0533471	0.000632944	0.268445	0.0170053	0.000656953	320.244	8.1076	335.038	3.8778	0.95	36	58.0299	618.016	0.0938971	0.0613674	2.07636	0.178442	1.61864	3.61063	0.745375	13.3515	4.70889	50.6938	15.0187	51.1108	8.90295	63.3292	9.42625	224.833
Plešovice	0.053144	0.00168864	0.396835	0.0126474	0.0541267	0.000679038	0.19894	0.0183035	0.000651137	339.35	9.19653	339.808	4.15665	0.99	36.8684	58.9121	645.277	0.0912974	0.162672	2.55882	0.237972	2.49318	2.97303	0.806083	13.2802	5.08678	52.6117	15.7734	55.2809	9.26286	68.0261	9.68299	238.237
Plešovice	0.0539258	0.00159764	0.40602	0.0120299	0.0545687	0.000647412	0.166154	0.0182533	0.000655275	346.005	8.69083	342.51	3.96185	0.98	38.6521	62.9994	655.369	0.0961281	0.0249405	2.10795	0.115643	1.61838	2.66656	0.764719	13.3887	5.07391	54.2711	15.6141	54.3653	9.22777	64.6078	9.88235	233.729
Plešovice	0.0560115	0.00174816	0.41401	0.0134924	0.0534268	0.000667664	0.255538	0.0173897	0.000650289	351.759	9.69164	335.526	4.08977	0.95	35.9739	58.5101	625.322	0.0935679	0.0370638	2.08344	0.145616	1.45305	3.3979	0.773188	12.8452	4.47485	49.8948	14.6252	51.4517	8.95336	63.7227	9.28143	223.139
Plešovice	0.0541203	0.00196154	0.413328	0.0151216	0.0548512	0.000822555	0.305167	0.0168927	0.000781026	351.269	10.8665	344.237	5.03024	0.97	32.8346	54.7736	568.442	0.0963575	0.0128241	1.76672	0.0880932	1.49056	3.74167	0.815136	10.4699	4.25811	47.4951	13.5853	46.5061	8.33749	62.8728	7.19325	208.633
Plešovice	0.054356	0.00222095	0.417626	0.0168422	0.0553062	0.000763449	0.0684762	0.0177822	0.000738996	354.352	12.0657	347.017	4.66735	0.97	34.3218	56.8207	586.807	0.0968304	0.0252473	1.88079	0.173465	1.51376	3.52978	0.933153	11.9981	4.81542	48.5001	14.0601	49.1044	8.66626	66.4505	7.20804	218.859
Plešovice	0.0576128	0.00218815	0.440576	0.0166252	0.0553286	0.000730745	0.208748	0.0180744	0.000755459	370.658	11.7209	347.154	4.46765	0.93	30.7517	51.6006	545.133	0.0946569	bd	1.5688	0.101525	1.55407	2.70049	0.804406	11.4501	4.17733	44.4284	12.7168	42.9746	7.97053	60.9833	6.82955	198.26
bd: below detection limit
